# Supplementary material for: A Rapid LC-MS/MS-PRM Assay for Serologic Quantification of Sialylated O-HPX Glycoforms in Patients with Liver Fibrosis
Source: MDPI journal article supplement (doi:10.3390/molecules27072213), 2022-03-29
Supplement: s1 [file s1]

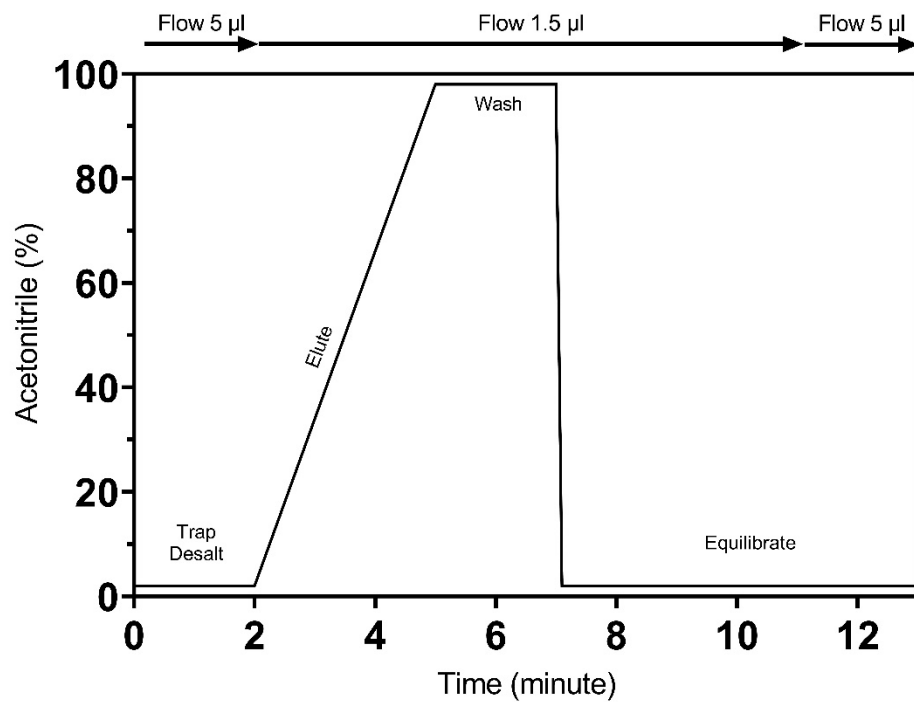

**Figure S1.** A schematic showing gradient conditions for LC-MS/MS analysis.

**Table S1.** Comparison of S-HPX measurement using nLC-MS-MRM and mLC-MS-PRM in unfractionated human serum samples. While seven target compounds were identified by mLC method, only two of the target compounds (tick marked) were identified by nLC method.

| Methodology | HexNAc | HexNAc-Hex | HexNAc-Hex-NeuAc | HexNAc-Hex-2NeuAc | 2HexNAc-2NeuAc | 2HexNAc-2Hex-3NeuAc | 2HexNAc-2Hex-4NeuAc |
|-------------|--------|------------|------------------|-------------------|----------------|---------------------|---------------------|
| nLC-MS-MRM  | ✗      | ✗          | ✓                | ✓                 | ✗              | ✗                   | ✗                   |
| mLC-MS-PRM  | ✓      | ✓          | ✓                | ✓                 | ✓              | ✓                   | ✓                   |

**Table S2.** Basic information on samples analyzed in this study.

| ID    | Disease Group | FE-MALE | Age | Race | FI-BRO_ISHAK_S00 | FI-BRO_ISHAK_M24 | FI-BRO_ISHAK_M48 |
|-------|---------------|---------|-----|------|------------------|------------------|------------------|
| 34916 | CIR           | 0       | 52  | 1    | 6                | 5                | 5                |
| 35018 | CIR           | 0       | 51  | 1    | 5                | 5                | 6                |
| 35027 | CIR           | 0       | 56  | 1    | 5                | 5                | 6                |
| 35036 | CIR           | 0       | 49  | 1    | 5                | 3                | 6                |
| 35060 | CIR           | 0       | 58  | 1    | 5                | 3                | 6                |
| 35066 | CIR           | 0       | 59  | 1    | 6                | 6                | 5                |
| 35074 | CIR           | 0       | 48  | 2    | 6                | 5                | 6                |
| 35083 | CIR           | 0       | 47  | 1    | 6                | 6                |                  |
| 35089 | CIR           | 1       | 54  | 1    | 5                | 6                | 6                |
| 35094 | CIR           | 0       | 47  | 2    | 5                | 5                | 5                |
| 35150 | CIR           | 0       | 51  | 1    | 6                | 6                | 6                |
| 35153 | CIR           | 1       | 55  | 1    | 6                | 5                |                  |
| 35165 | CIR           | 1       | 53  | 1    | 6                | 6                | 6                |
| 35166 | CIR           | 1       | 57  | 2    | 6                | 6                | 6                |
| 35181 | CIR           | 0       | 45  | 1    | 6                | 6                | 5                |

|                      |      |   |    | AVG | 5.6 | 5.2  | 5.69 |
|----------------------|------|---|----|-----|-----|------|------|
| 34926                | FIB  | 0 | 47 | 1   | 3   | 3    | 3    |
| 34946                | FIB  | 1 | 40 | 1   | 3   | 3    | 3    |
| 34958                | FIB  | 0 | 47 | 1   | 4   | 3    | 3    |
| 34967                | FIB  | 1 | 65 | 1   | 3   | 3    | 3    |
| 34973                | FIB  | 1 | 53 | 1   | 4   | 4    | 2    |
| 34994                | FIB  | 0 | 49 | 1   | 3   | 2    | 2    |
| 35008                | FIB  | 0 | 55 | 1   | 4   | 4    | 4    |
| 35016                | FIB  | 0 | 41 | 1   | 3   |      | 4    |
| 35033                | FIB  | 0 | 51 | 1   | 4   | 4    | 3    |
| 35051                | FIB  | 0 | 55 | 2   | 3   | 4    | 4    |
| 35062                | FIB  | 0 | 44 | 1   | 3   | 2    | 2    |
| 35077                | FIB  | 0 | 42 | 1   | 4   | 3    | 3    |
| 35080                | FIB  | 0 | 47 | 2   | 3   | 1    | 2    |
| 35082                | FIB  | 0 | 45 | 1   | 4   | 3    | 3    |
| 35098                | FIB  | 1 | 50 | 2   | 3   | 4    | 4    |
|                      |      |   |    | AVG | 3.4 | 3.07 | 3    |
| <b>Control Group</b> |      |   |    |     |     |      |      |
| 14758                | CTRL | 0 | 50 | 1   |     |      |      |
| 13692                | CTRL | 0 | 51 | 1   |     |      |      |
| 15962                | CTRL | 0 | 53 | 1   |     |      |      |
| 20917                | CTRL | 0 | 46 | 1   |     |      |      |
| 20919                | CTRL | 0 | 46 | 1   |     |      |      |
| 13686                | CTRL | 0 | 46 | 1   |     |      |      |
| 16020                | CTRL | 0 | 47 | 1   |     |      |      |
| 13472                | CTRL | 0 | 47 | 1   |     |      |      |
| 20913                | CTRL | 0 | 48 | 1   |     |      |      |
| 20895                | CTRL | 0 | 56 | 2   |     |      |      |
| 20912                | CTRL | 0 | 57 | 2   |     |      |      |
| 20908                | CTRL | 1 | 54 | 1   |     |      |      |
| 16970                | CTRL | 1 | 57 | 1   |     |      |      |
| 14809                | CTRL | 1 | 57 | 1   |     |      |      |
| 20887                | CTRL | 1 | 43 | 2   |     |      |      |

|        |                  | Mean Age | Male Gender | Race Caucasian | Race African American |
|--------|------------------|----------|-------------|----------------|-----------------------|
| Age    | CTRL (n=15)      | 51       | 11          | 12             | 3                     |
|        | Fibrosis (n=15)  | 49       | 11          | 12             | 3                     |
|        | Cirrhosis (n=15) | 52       | 11          | 12             | 3                     |
| Gender | Female           | 4        |             |                |                       |
|        | Male             | 11       |             |                |                       |
| Race   | White            | 12       |             |                |                       |
|        | Black            | 3        |             |                |                       |
